# Supplementary material for: An I6P7peptide modified fluorescent probe for bio-imaging
Source: Royal Society of Chemistry journal article supplement (doi:10.1039/c8nj04255a), 2018-12-04
Supplement: c8nj04255a1.pdf [file c8nj04255a1.pdf]

*Supporting information*

**An I<sub>6</sub>P<sub>7</sub> Peptide modified Fluorescent Probe for Bio-imaging**

Yuxin Yao<sup>‡</sup>, Lijuan Gui<sup>‡</sup>, Zhenwei Yuan, Yisha Chen, Chen Wei, Qing He, Fei Wang,

Mingjun Xu, Haiyan Chen\*

<sup>a</sup>Department of Biomedical Engineering, School of Engineering, State Key Laboratory of

Natural Medicines, China Pharmaceutical University, 24 Tongjia Lane, Gulou District,

Nanjing 210009, China

E-mail: chenhaiyan@cpu.edu.cn

<sup>‡</sup>These authors contributed equally to this work.

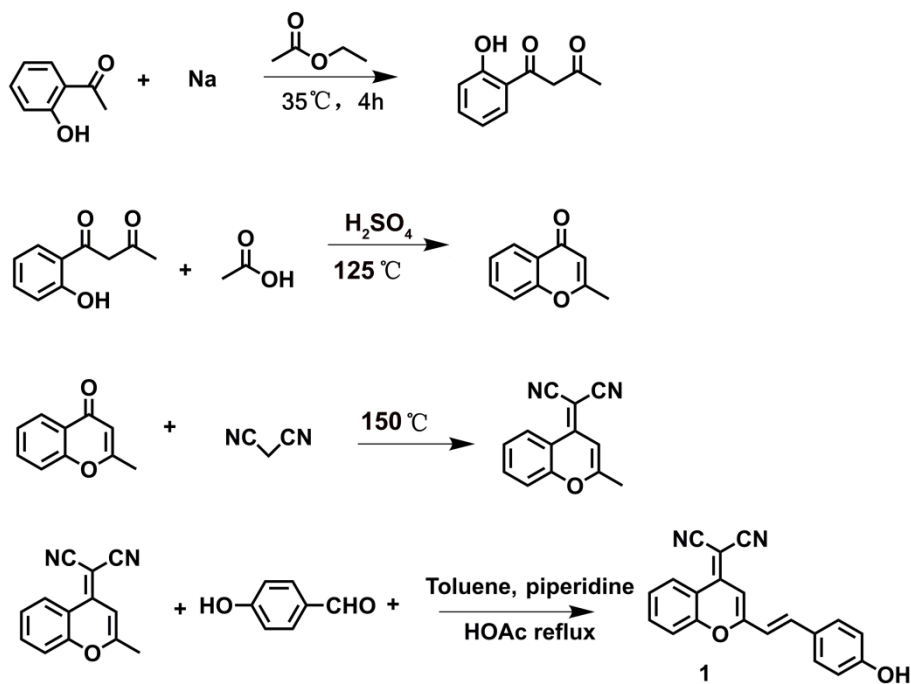

Fig. S1 Compound 1 synthesis route.

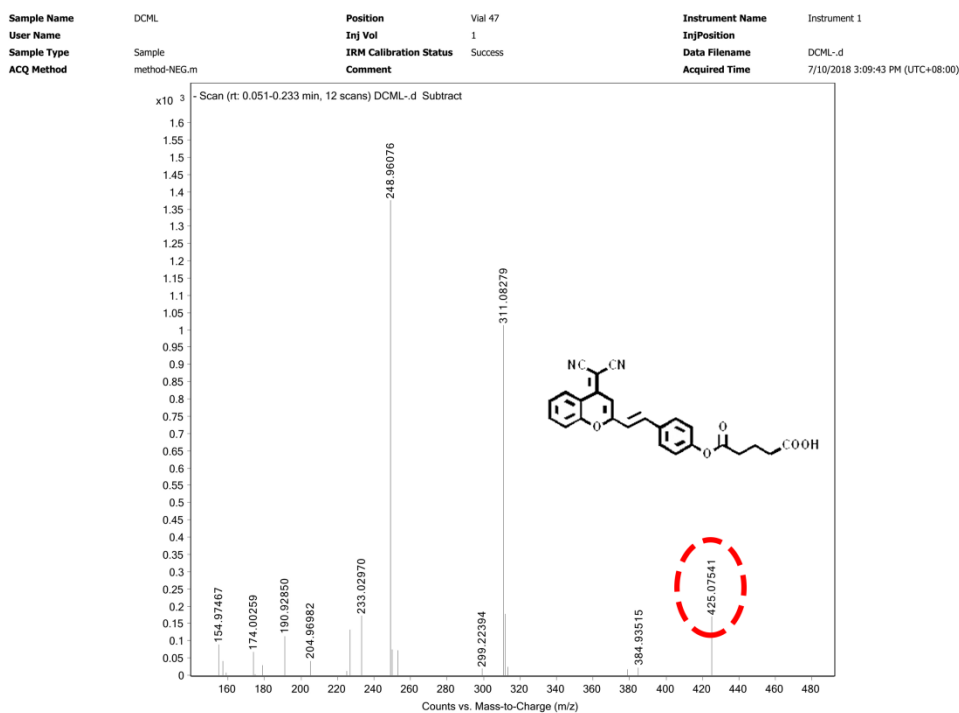

Fig. S2 The MALDI-TOF-Mass spectra of DCM-L.

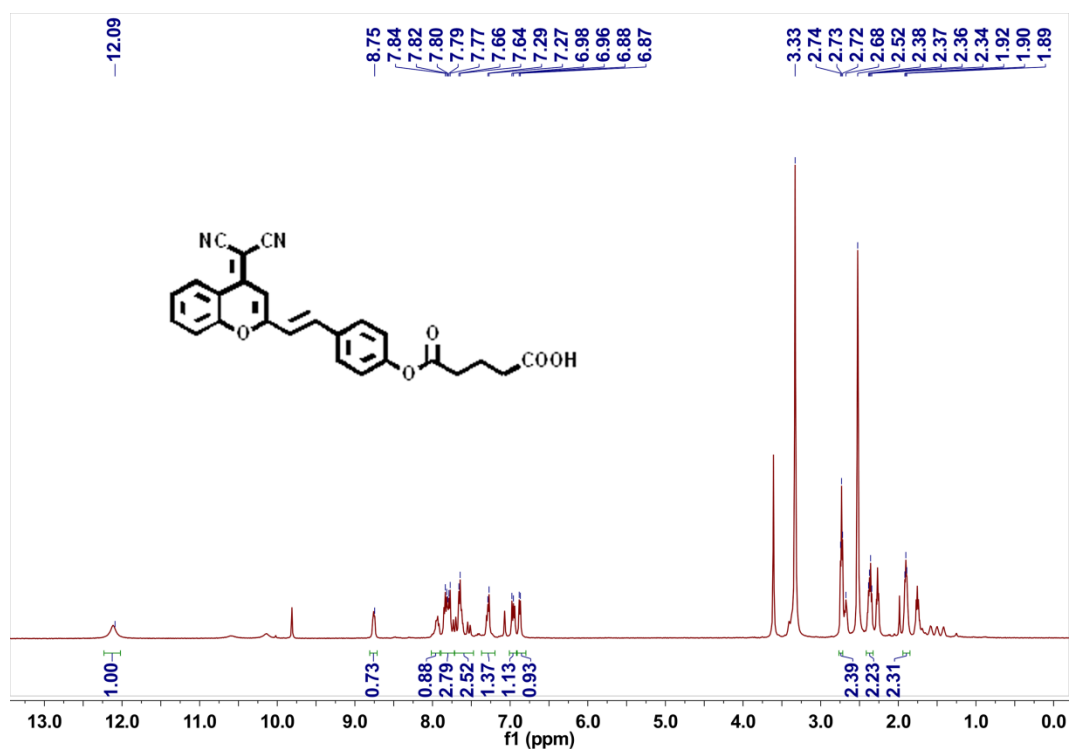

Fig. S3 The <sup>1</sup>H NMR spectra of DCM-L.

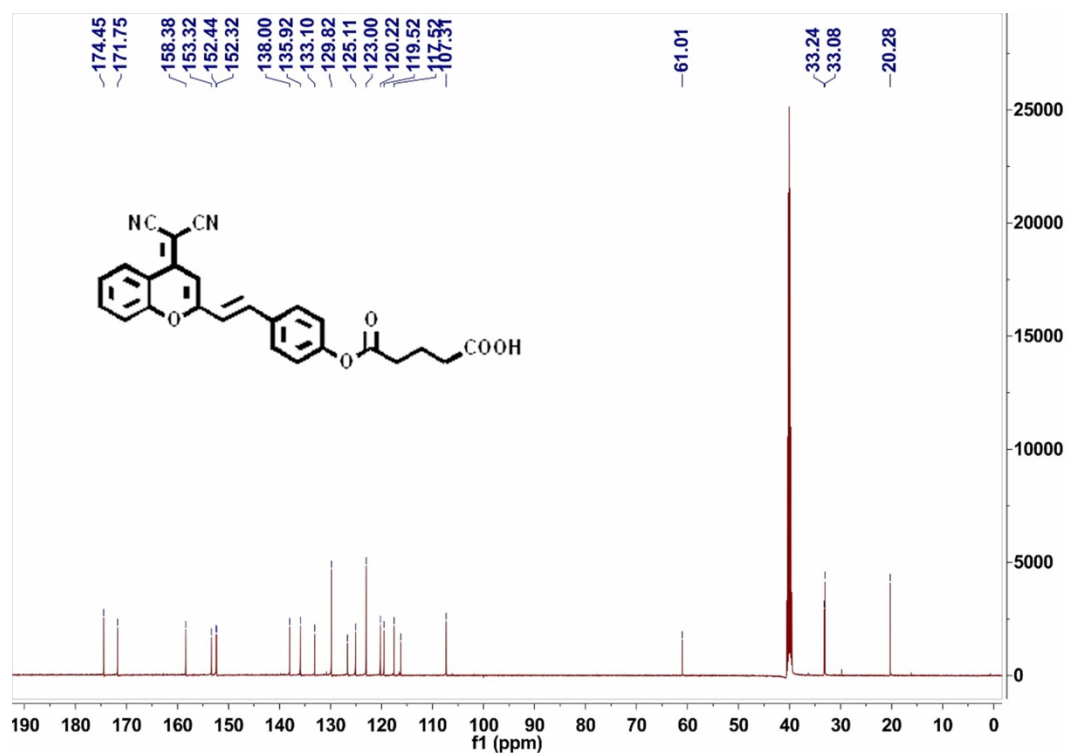

Fig. S4 The <sup>13</sup>C NMR spectra of DCM-L.

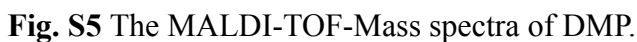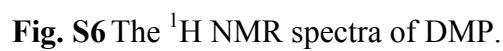

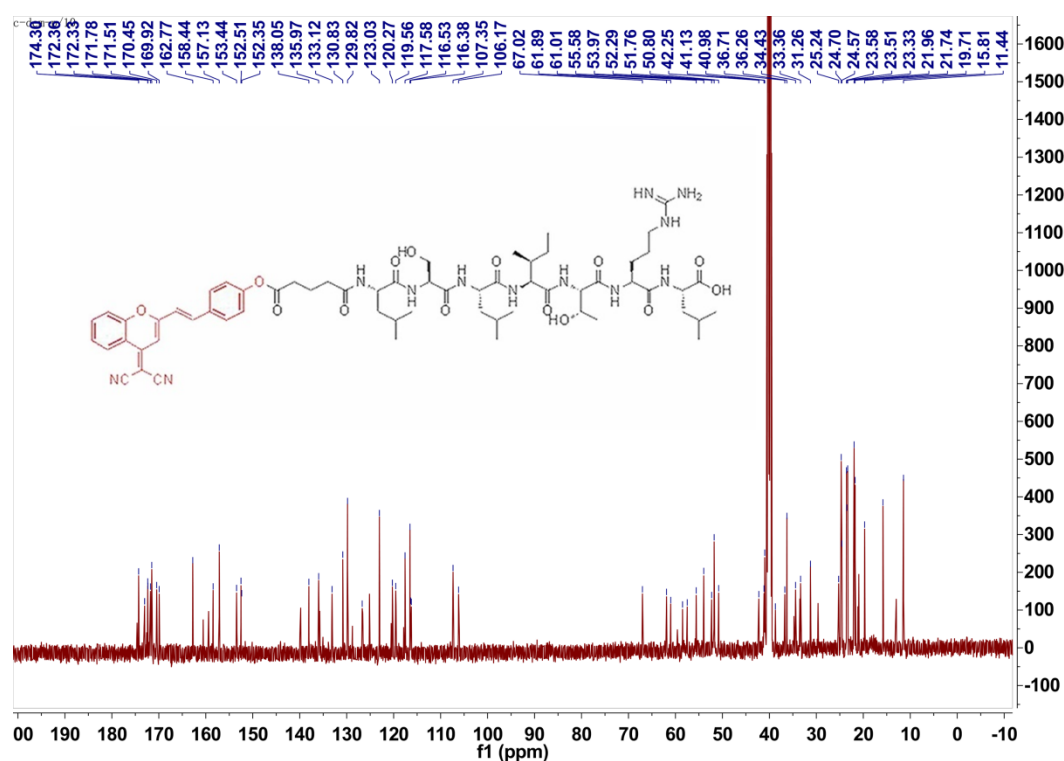

Fig. S7 The  $^{13}\text{C}$  NMR spectra of DMP.

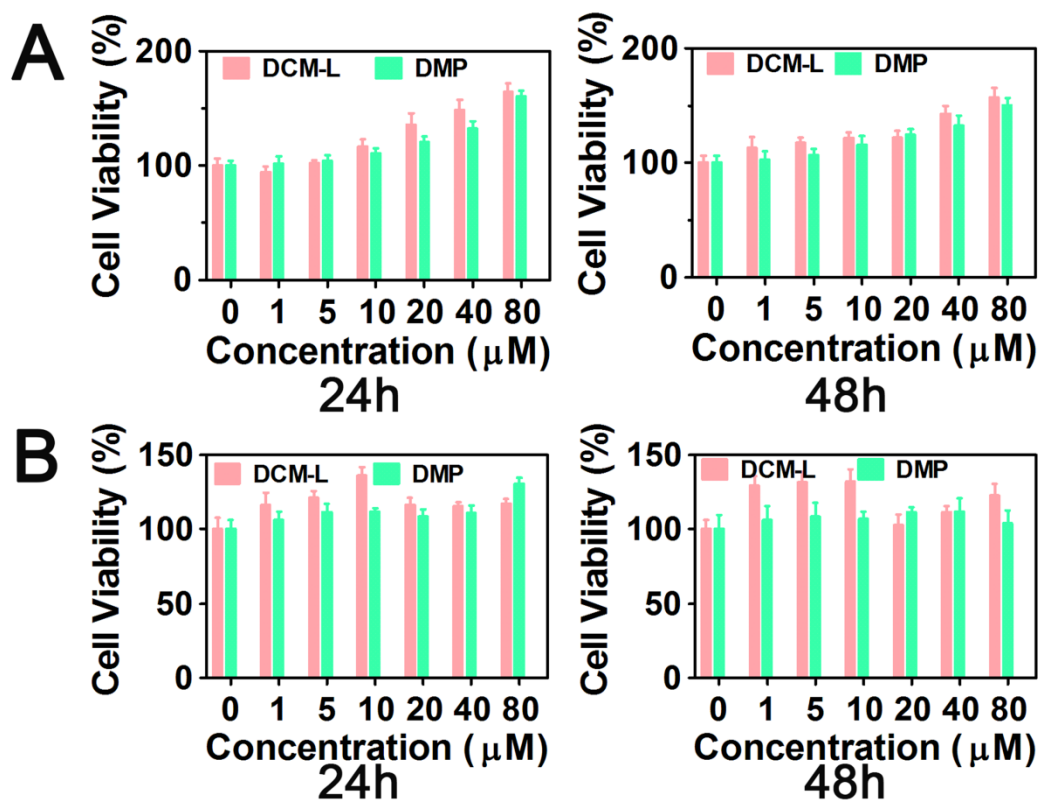

Fig. S8 Cell viability of HUVEC (A) and U87 (B) cells incubation with DCM-L, DMP for 24 h and 48 h respectively. Data are expressed as mean  $\pm$  S.D. (n = 4).
